# Supplementary material for: Dihydromyricetin Attenuates Depressive-like Behaviors in Mice by Inhibiting the AGE-RAGE Signaling Pathway
Source: MDPI journal article supplement (doi:10.3390/cells11233730), 2022-11-22
Supplement: s1 [file s1]

Supplementary data

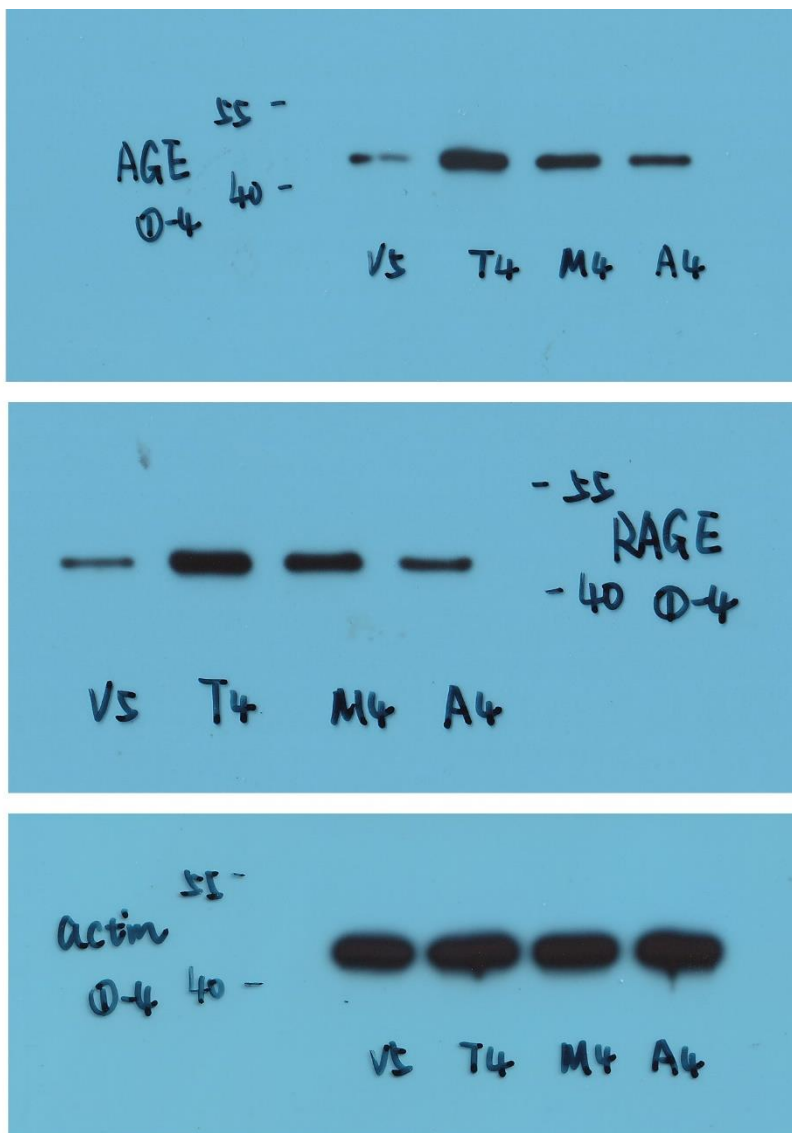

**V5:** Control  
**T4:** CORT  
**M4:** CORT+DHM  
**A4:** a sample for another project.

**Figure S1.** The original Western blot images for Figure 7A.
