# Supplementary material for: Dihydromyricetin Attenuates Depressive-like Behaviors in Mice by Inhibiting the AGE-RAGE Signaling Pathway
Source: Cells. 2022 Nov 22;11(23):3730. doi: 10.3390/cells11233730 (PMC9738449; doi:10.3390/cells11233730)
Supplement: Supplementary file 1 [file cells-11-03730-s001.zip]

Archive with 4 entries (4 files):
- cells-1999597-supplementary.pdf
- Table S1 DHM.xlsx
- Table S2 DHM.xlsx
- Table S3 DHM.xlsx
