# Supplementary material for: Dihydromyricetin Attenuates Depressive-like Behaviors in Mice by Inhibiting the AGE-RAGE Signaling Pathway
Source: Cells. 2022 Nov 22;11(23):3730. doi: 10.3390/cells11233730 (PMC9738449; doi:10.3390/cells11233730)
Supplement: Supplementary file 1 [file cells-11-03730-s001.zip › Table S1 DHM.xlsx]

## Sheet: Sheet1
Table S1 targets of Dihydromyricetin
	gene name
No.1	ESR1
No.2	AKR1B1
No.3	CA5A
No.4	ESR2
No.5	MAOA
No.6	PTGS1
No.7	MIF
No.8	PPO2
No.9	ALOX15
No.10	CES2
No.11	BCL2A1
No.12	CA7
No.13	Adra2c
No.14	HSD17B1
No.15	CA5B
No.16	CA4
No.17	CA6
No.18	HSD17B2
No.19	DUSP3
No.20	CA12
No.21	Nos2
No.22	Tubb2b
No.23	GPR35
No.24	XDH
No.25	CA13
No.26	CDC25B
No.27	RIPK2
No.28	DNMT1
No.29	RELA
No.30	CYP19A1
No.31	PLIN5
No.32	ABCG2
No.33	PTPN1
No.34	TUBA1A
No.35	PLIN1
No.36	TLR9
No.37	AHR
No.38	HNF4A
No.39	AR
No.40	CTDSP1
No.41	PTPN7
No.42	TERT
No.43	STS
No.44	PIM1
No.45	CA14
No.46	CASP9
No.47	MAOB
No.48	ALPL
No.49	HSD17B3
No.50	Alox5
No.51	CA9
No.52	HCAR2
No.53	Htr6
No.54	CYP1A2
No.55	HDAC4
No.56	ache
No.57	NR2F2
No.58	PTGS2
No.59	PGR
No.60	ABCB1
No.61	MMP12
No.62	CHRNA4
No.63	GSK3A
No.64	GALR3
No.65	DRD2
No.66	SIRT2
No.67	Cnr2
No.68	ADRA2B
No.69	PLA2G1B
No.70	Drd1
No.71	SERPINE1
No.72	PLAT
No.73	Chrm2
No.74	CES1
No.75	RPS6KA3
No.76	DRD5
No.77	PIM3
No.78	HTR1E
No.79	GRIN2B
No.80	GRM2
No.81	GRIA2
No.82	NR3C2
No.83	APOBEC3A
No.84	RORA
No.85	MGLL
No.86	PTPRC
No.87	SIRT1
No.88	NR2E3
No.89	HSP90AA1
No.90	MDM2
No.91	Rac1
No.92	PRKCE
No.93	Htr3a
No.94	PIM2
No.95	ampC
No.96	F10
No.97	CACNA1B
No.98	S1PR2
No.99	TAAR1
No.100	CNR1
No.101	MMP13
No.102	CYP1B1
No.103	ABCC1
No.104	SHBG
No.105	CBR1
No.106	BACE1
No.107	KLK1
No.108	KLK2
No.109	KIT
No.110	SRC
No.111	KDR
No.112	FGFR1
No.113	MET
No.114	CA2
No.115	CA1
No.116	CA3
No.117	TAS2R31
No.118	MAPT
No.119	DYRK1A
No.120	KCNH2
No.121	APP
No.122	MAPK14
No.123	MMP2
No.124	PGD
No.125	ST3GAL3
No.126	FUT7
No.127	MMP14
No.128	FUT4
No.129	STAT1
No.130	SQLE
No.131	RXRA
No.132	ADORA1
No.133	HIF1A
No.134	PPARG
No.135	PGF
No.136	VEGFA
No.137	ADORA3
No.138	BCL2
No.139	GRM5
No.140	POLB
No.141	PLA2G2A
No.142	PLA2G5
No.143	PLA2G10
No.144	GABRA1
No.145	MMP9
No.146	PPARA
No.147	GABRB2
No.148	GABRG2
