# Supplementary material for: Dihydromyricetin Attenuates Depressive-like Behaviors in Mice by Inhibiting the AGE-RAGE Signaling Pathway
Source: Cells. 2022 Nov 22;11(23):3730. doi: 10.3390/cells11233730 (PMC9738449; doi:10.3390/cells11233730)
Supplement: Supplementary file 1 [file cells-11-03730-s001.zip › Table S2 DHM.xlsx]

## Sheet: Sheet1
Table S2 targets of depression
	Gene Symbol
No.1	HTR2A
No.2	SLC6A4
No.3	TPH2
No.4	FKBP5
No.5	NOTCH3
No.6	BDNF
No.7	MDD1
No.8	MDD2
No.9	COMT
No.10	LOC110806262
No.11	HTR1A
No.12	IL6
No.13	MAOA
No.14	CRH
No.15	DRD2
No.16	TNF
No.17	NR3C1
No.18	PRL
No.19	TPH1
No.20	MAFD1
No.21	CRP
No.22	HTR2C
No.23	SLC6A3
No.24	SLC6A2
No.25	CRHR1
No.26	APOE
No.27	TWNK
No.28	IL1B
No.29	POMC
No.30	MAFD2
No.31	MAPT
No.32	CREB1
No.33	CYP2D6
No.34	MTHFR
No.35	IL10
No.36	MAFD3
No.37	MAFD4
No.38	MAFD5
No.39	MAFD6
No.40	MAFD8
No.41	MAFD9
No.42	DCTN1
No.43	TH
No.44	GRIN2B
No.45	GRIA1
No.46	ESR1
No.47	NTRK2
No.48	NPY
No.49	OXT
No.50	DLG4
No.51	INS
No.52	HTR1B
No.53	DRD4
No.54	PCLO
No.55	FGFR1
No.56	GRIN1
No.57	LEP
No.58	IFNG
No.59	XBP1
No.60	OPRM1
No.61	CACNA1C
No.62	GNB3
No.63	WFS1
No.64	ALB
No.65	DRD3
No.66	DISC1
No.67	POLG
No.68	SNCA
No.69	OXTR
No.70	PER3
No.71	GRIN2A
No.72	GAD1
No.73	NR4A2
No.74	GBA1
No.75	HTR3A
No.76	MECP2
No.77	CLOCK
No.78	FMR1
No.79	NR3C2
No.80	PRNP
No.81	PER2
No.82	CYP2C19
No.83	NOS1
No.84	CNR1
No.85	IL2
No.86	PVALB
No.87	GCH1
No.88	AKT1
No.89	GSK3B
No.90	ACE
No.91	GNAS
No.92	MIR132
No.93	MAOB
No.94	HTR1D
No.95	SLC18A2
No.96	GDNF
No.97	DRD1
No.98	GRM2
No.99	GRIK2
No.100	NGF
No.101	CHRM2
No.102	GHRL
No.103	PIK3R1
No.104	GRM7
No.105	RELN
No.106	TRH
No.107	NRXN1
No.108	DNMT1
No.109	DVL3
No.110	CYP1A2
No.111	CYP2B6
No.112	HCRT
No.113	IFNA1
No.114	HTT
No.115	PRODH
No.116	KRAS
No.117	GRM1
No.118	RORA
No.119	TPO
No.120	NR1D1
No.121	DTNBP1
No.122	IDO1
No.123	CYP3A4
No.124	GLI2
No.125	CYP2C9
No.126	GAL
No.127	TSPO
No.128	LRRK2
No.129	GAD2
No.130	MAP2K1
No.131	CRY2
No.132	VGF
No.133	CCK
No.134	IGF1
No.135	PRKN
No.136	DAOA
No.137	SST
No.138	GFAP
No.139	PTCH1
No.140	GRM5
No.141	SOD1
No.142	BRAF
No.143	NPAS2
No.144	CREBBP
No.145	MTOR
No.146	COL1A1
No.147	PDYN
No.148	ITIH3
No.149	CRHBP
No.150	FGFR3
No.151	CRY1
No.152	TTC9B
No.153	GABRD
No.154	HTR7
No.155	COL2A1
No.156	BMAL1
No.157	GRM3
No.158	SIRT1
No.159	TACR1
No.160	HLA-DQB1
No.161	FOS
No.162	DISC2
No.163	SLC1A3
No.164	AVPR1B
No.165	APP
No.166	GABRA1
No.167	IL4
No.168	KDM6A
No.169	SHANK3
No.170	SYNJ1
No.171	ADCYAP1
No.172	TIMELESS
No.173	PROK2
No.174	CRHR2
No.175	PSAP
No.176	C9orf72
No.177	PSEN1
No.178	CSNK1E
No.179	AR
No.180	COL11A2
No.181	FGF8
No.182	TOR1A
No.183	P2RX7
No.184	TCF4
No.185	PTEN
No.186	GRIA2
No.187	ATP1A3
No.188	TAC1
No.189	TP53
No.190	MAP2K2
No.191	POU1F1
No.192	GRIA3
No.193	SHH
No.194	COL11A1
No.195	SYP
No.196	KMT2A
No.197	ACTB
No.198	ANKK1
No.199	GPR50
No.200	BCL2A1
No.201	MT-ND1
No.202	S100B
No.203	HLA-DRB1
No.204	TWIST2
No.205	OPN4
No.206	HTR4
No.207	ASMT
No.208	PTPN11
No.209	SYN2
No.210	TBP
No.211	ATP2A2
No.212	FGFR2
No.213	PLA2G6
No.214	ALX4
No.215	MEN1
No.216	DBH
No.217	NTF3
No.218	MAPK1
No.219	CCL2
No.220	FRAXA
No.221	EP300
No.222	DRD5
No.223	SNAP25
No.224	HESX1
No.225	DAO
No.226	ABCB1
No.227	CYP27A1
No.228	MED13L
No.229	ATXN2
No.230	LRP8
No.231	H2AC18
No.232	ATXN8OS
No.233	PAX6
No.234	HTR2B
No.235	PRKAR1A
No.236	KMT2D
No.237	LOC106627981
No.238	FOXH1
No.239	GRIA4
No.240	GNRH1
No.241	NFIX
No.242	GABRB3
No.243	BHLHE41
No.244	SERPINA3
No.245	TSC2
No.246	CD4
No.247	ADAM10
No.248	CISD2
No.249	MTNR1A
No.250	ARSA
No.251	INPPL1
No.252	GPC6
No.253	CXCL8
No.254	FLNB
No.255	TP63
No.256	CDH23
No.257	ADIPOQ
No.258	AIP
No.259	TGIF1
No.260	IMPA1
No.261	RRM2B
No.262	NRG1
No.263	HP1BP3
No.264	LHB
No.265	VIPR2
No.266	PON1
No.267	PDE11A
No.268	SGCE
No.269	BMAL2
No.270	GPHN
No.271	CNTNAP2
No.272	HSD11B2
No.273	POLG2
No.274	ELP4
No.275	PRMT7
No.276	TACR3
No.277	ZIC2
No.278	MAN2B1
No.279	USH2A
No.280	EIF4B
No.281	DISP1
No.282	VCP
No.283	SMPD1
No.284	XK
No.285	SORCS2
No.286	BRCA2
No.287	PDGFB
No.288	TARDBP
No.289	PICK1
No.290	PDLIM5
No.291	DLL1
No.292	MEF2C
No.293	MT-TL1
No.294	VEGFA
No.295	WASHC5
No.296	TFAP2B
No.297	CHD7
No.298	GRIK4
No.299	VPS13C
No.300	ANK3
No.301	LINC02153
No.302	LINC02152
No.303	CHRNA7
No.304	CDON
No.305	GAS1
No.306	GAP43
No.307	CC2D1A
No.308	OTX2
No.309	CACNA1H
No.310	SMIM30
No.311	LINC01108
No.312	PNOC
No.313	AANAT
No.314	GRID2
No.315	SIX3
No.316	TONSL
No.317	NODAL
No.318	PDE4B
No.319	SLC25A4
No.320	TG
No.321	WAC
No.322	SCN2A
No.323	GABRG2
No.324	ERBB4
No.325	HCRTR1
No.326	PRKACA
No.327	SLC1A2
No.328	PROP1
No.329	HCRTR2
No.330	WDR26
No.331	TRANK1
No.332	CHAT
No.333	CD96
No.334	BMPER
No.335	PREP
No.336	FZD2
No.337	SYNE1
No.338	DNAJC13
No.339	IDUA
No.340	DLG3
No.341	ALG9
No.342	MIR155
No.343	RFC1
No.344	ADH1C
No.345	CTLA4
No.346	LPL
No.347	TMEM106B
No.348	PPARG
No.349	PDGFRB
No.350	NEB
No.351	HLA-DQA1
No.352	HOMER1
No.353	STIL
No.354	PARK7
No.355	PALS1
No.356	AMY1A
No.357	TDGF1
No.358	SETD5
No.359	ZNF804A
No.360	MIR9-1
No.361	LMAN2L
No.362	ABCC9
No.363	CALB1
No.364	AMY1C
No.365	AMY1B
No.366	CRLF1
No.367	FAM20C
No.368	EHMT1
No.369	SLC6A1
No.370	FBN1
No.371	SLC2A1
No.372	TRAPPC9
No.373	GRIK1
No.374	RGS4
No.375	PCNT
No.376	RORB
No.377	LHX4
No.378	MED12
No.379	IL17A
No.380	SP4
No.381	GLB1
No.382	SOX5
No.383	LBR
No.384	FUS
No.385	PEX6
No.386	ATP7B
No.387	PAH
No.388	CDH11
No.389	CSNK1D
No.390	CLCF1
No.391	SETD1A
No.392	PLOD1
No.393	GNAL
No.394	PPIG
No.395	PMM2
No.396	GRN
No.397	CHST3
No.398	STAG2
No.399	RBFOX1
No.400	RHO
No.401	IL18
No.402	NPC1
No.403	HP
No.404	SNCAIP
No.405	GNAI2
No.406	USP8
No.407	KCNQ3
No.408	PTPN22
No.409	STIN2-VNTR
No.410	SPECC1L
No.411	VDR
No.412	FLNA
No.413	PHF21A
No.414	SHANK2
No.415	KDM6B
No.416	MIR433
No.417	TCF7L2
No.418	CTNNB1
No.419	HSPG2
No.420	CA4
No.421	STUB1
No.422	ADRA2A
No.423	GLUD2
No.424	MIR124-1
No.425	GABRA3
No.426	NTNG2
No.427	KLHL7
No.428	IRF6
No.429	MIR144
No.430	NRGN
No.431	CSF1R
No.432	TTR
No.433	CBLN1
No.434	FAAH
No.435	TRIM32
No.436	DMD
No.437	TK2
No.438	ATRX
No.439	MAP2
No.440	CHRNA4
No.441	CHMP2B
No.442	DPP4
No.443	NPAS3
No.444	BDNF-AS
No.445	GABRB1
No.446	SMC1A
No.447	NOS2
No.448	NBN
No.449	SPTBN1
No.450	MIR30E
No.451	PIK3CA
No.452	IL2RA
No.453	HLA-B
No.454	ATP13A2
No.455	PIGT
No.456	EDNRA
No.457	GABRA5
No.458	PDCD1
No.459	ACSL4
No.460	TREM2
No.461	BCL2
No.462	SCN1A
No.463	CSTB
No.464	GABRA2
No.465	TBX1
No.466	ERF
No.467	IL1A
No.468	KCTD17
No.469	GRIN3A
No.470	PYY
No.471	DNAJC6
No.472	LGI1
No.473	NOS1AP
No.474	TBX4
No.475	GALT
No.476	MAF
No.477	DDC
No.478	SLC7A6OS
No.479	CHI3L1
No.480	STX1A
No.481	DEAF1
No.482	RYR1
No.483	GSR
No.484	NF1
No.485	TLR4
No.486	DCANP1
No.487	KMT2B
No.488	DHRS9
No.489	CASR
No.490	LINC-ROR
No.491	DLG1
No.492	GHR
No.493	GPC4
No.494	PINK1
No.495	CLN6
No.496	MIR29C
No.497	GABBR1
No.498	PREPL
No.499	PTGS2
No.500	TDO2
No.501	ARSB
No.502	PPARGC1A
No.503	GABRB2
No.504	CCR6
No.505	MIR24-1
No.506	TRPV4
No.507	CACNA1B
No.508	TRPV1
No.509	SLC17A7
No.510	MYT1L
No.511	DVL1
No.512	GATA1
No.513	SOX9
No.514	FH
No.515	RERE
No.516	AGTR2
No.517	CACNA1A
No.518	CSMD1
No.519	IQSEC2
No.520	OSTF1
No.521	FBXL3
No.522	NPAS4
No.523	AP2S1
No.524	PDE4D
No.525	CCDC22
No.526	ARC
No.527	ADORA1
No.528	PRKCG
No.529	MARCKS
No.530	IMPA2
No.531	GRIP1
No.532	SYN1
No.533	CCBE1
No.534	SLC2A3
No.535	ESR2
No.536	UBQLN2
No.537	PMS2
No.538	RAF1
No.539	MIR425
No.540	TNFRSF1A
No.541	NEFL
No.542	ELN
No.543	GNRHR
No.544	PIGN
No.545	TFAP2A
No.546	KCNQ2
No.547	COL1A2
No.548	CLCN1
No.549	INPP1
No.550	HRAS
No.551	MIR137
No.552	PLP1
No.553	PTCHD1
No.554	ERCC1
No.555	ADNP
No.556	DNMT3B
No.557	PKDCC
No.558	KAT5
No.559	DUSP6
No.560	NCAN
No.561	TAF1
No.562	SMC3
No.563	TRRAP
No.564	NDUFV2
No.565	PIGA
No.566	RETN
No.567	RET
No.568	PLCG1
No.569	CDKN1B
No.570	BCR
No.571	ZBTB24
No.572	SLC6A15
No.573	CHRNB2
No.574	FOXA2
No.575	TBR1
No.576	SQSTM1
No.577	GJA1
No.578	C19orf12
No.579	HTR6
No.580	RAI1
No.581	SLC26A2
No.582	AARS2
No.583	PENK
No.584	WNT5A
No.585	GADL1
No.586	CTU2
No.587	CAT
No.588	ADRB2
No.589	LOC107032825
No.590	ACTL6B
No.591	ARID1B
No.592	EXTL3
No.593	ATRIP
No.594	MIR142
No.595	BMP2
No.596	PGAP1
No.597	TONSL-AS1
No.598	FMO3
No.599	ADH1B
No.600	TAC3
No.601	SLC12A2
No.602	COQ2
No.603	PIEZO2
No.604	NOS3
No.605	TGFB1
No.606	CHRFAM7A
No.607	NCAM1
No.608	PROKR2
No.609	MBD5
No.610	AVP
No.611	NDST3
No.612	SUFU
No.613	MIRLET7D
No.614	ALDH2
No.615	GRIN2C
No.616	DPYSL2
No.617	CACNB2
No.618	EDN1
No.619	MEG3
No.620	AHDC1
No.621	TUBB
No.622	SMARCA2
No.623	GH1
No.624	USB1
No.625	CALCA
No.626	AVPR1A
No.627	CNR2
No.628	SPEN
No.629	GLI3
No.630	ACHE
No.631	GRIN2D
No.632	TREX1
No.633	HSP90B1
No.634	GPC6-AS2
No.635	MADD
No.636	MMP9
No.637	IL1RN
No.638	USH1C
No.639	SLC18A3
No.640	PODXL
No.641	POGZ
No.642	IL1R1
No.643	CNTF
No.644	NGFR
No.645	UCHL1
No.646	SLC1A4
No.647	ROR2
No.648	CDKN1A
No.649	EDARADD
No.650	GLA
No.651	PIGL
No.652	KCNMA1
No.653	DHCR7
No.654	ICAM1
No.655	SLC45A1
No.656	PSNP2
No.657	PSNP3
No.658	COL7A1
No.659	KISS1R
No.660	NRG3
No.661	INPP5E
No.662	JAK2
No.663	TF
No.664	KDM4C
No.665	KMT2E
No.666	HSD17B4
No.667	EDAR
No.668	FBXO31
No.669	IQSEC1
No.670	LEPQTL1
No.671	IGFBP3
No.672	ATXN10
No.673	FAT4
No.674	GPT
No.675	JPH3
No.676	PCDH15
No.677	MYO7A
No.678	MAD1L1
No.679	CCND2
No.680	ZEB2
No.681	FTO
No.682	DLK1
No.683	GLUL
No.684	REN
No.685	BRAT1
No.686	STAT4
No.687	KISS1
No.688	IL2RB
No.689	SLC1A1
No.690	MYOD1
No.691	PPP1R1B
No.692	ARMC5
No.693	TCF20
No.694	RAB39B
No.695	HLA-A
No.696	RPS20
No.697	KCNT1
No.698	MT-TS2
No.699	EGF
No.700	TRIP11
No.701	NSUN2
No.702	HTR3B
No.703	MMP1
No.704	SCN1B
No.705	EXT2
No.706	PTH
No.707	PIGY
No.708	MTNR1B
No.709	HDAC6
No.710	TNFAIP3
No.711	RSPRY1
No.712	SPECC1L-ADORA2A
No.713	VPS35
No.714	LIMK1
No.715	CLIP1
No.716	F2
No.717	DPH1
No.718	IFNB1
No.719	MLXIPL
No.720	TGFBR2
No.721	MT-CO1
No.722	PIK3CD
No.723	PIK3C2A
No.724	DEPDC5
No.725	SLC35C1
No.726	CDKN1C
No.727	AGTR1
No.728	RPS6KA3
No.729	POR
No.730	RTN4R
No.731	TSHB
No.732	NDEL1
No.733	TBK1
No.734	DGKH
No.735	HS6ST1
No.736	NSMF
No.737	GRHL3
No.738	SERPINE1
No.739	AGER
No.740	VPS13A
No.741	CDKL5
No.742	SOS1
No.743	PPP2R2B
No.744	SELP
No.745	SMO
No.746	NKX2-5
No.747	MIR128-1
No.748	SOST
No.749	KCNJ2
No.750	EPM2A
No.751	PANK2
No.752	STX16
No.753	PF4
No.754	ETS1
No.755	FOXC1
No.756	ADA
No.757	NXN
No.758	SCN9A
No.759	STXBP1
No.760	BMPR1A
No.761	VWF
No.762	SMARCA4
No.763	NSD1
No.764	NCS1
No.765	ITPR1
No.766	EDA
No.767	TMEM94
No.768	ALG3
No.769	EYA1
No.770	INSR
No.771	BRD1
No.772	AGT
No.773	KAT6B
No.774	SOD2
No.775	AUTS2
No.776	MIR598
No.777	DPYSL5
No.778	NEK1
No.779	FGF20
No.780	TSC1
No.781	EIF4G1
No.782	PLCB1
No.783	ASXL3
No.784	LOC112543470
No.785	XYLT1
No.786	WDR35
No.787	B3GLCT
No.788	RNASEH2C
No.789	RAPSN
No.790	ADCY10
No.791	TENM4
No.792	SLCO1C1
No.793	IRS1
No.794	MUSK
No.795	PURA
No.796	COG4
No.797	PPOX
No.798	CASP3
No.799	RAD21
No.800	HEPACAM
No.801	CD8A
No.802	HDAC4
No.803	ATXN1
No.804	MLH1
No.805	PCDH19
No.806	MT-ND4
No.807	ADORA2A
No.808	FGF17
No.809	SPRY4
No.810	WDR11
No.811	OPRD1
No.812	CAMKMT
No.813	MSH2
No.814	SETBP1
No.815	RUNX2
No.816	AP1G1
No.817	ATXN3
No.818	CLN3
No.819	GLT8D1
No.820	GNA11
No.821	NR1H4
No.822	ARSG
No.823	ADGRV1
No.824	ADCYAP1R1
No.825	HDAC8
No.826	FANCL
No.827	PDE8B
No.828	MIR133B
No.829	MTOR-AS1
No.830	PARK10
No.831	PARK16
No.832	CELIAC2
No.833	PARK12
No.834	CELIAC10
No.835	CELIAC11
No.836	CELIAC12
No.837	CELIAC13
No.838	CELIAC5
No.839	CELIAC6
No.840	CELIAC7
No.841	CELIAC8
No.842	CELIAC9
No.843	PARK21
No.844	CACNG2
No.845	GMNN
No.846	DYRK1A
No.847	HMBS
No.848	FOXG1
No.849	APOB
No.850	IL6R
No.851	RSRC1
No.852	NCF1
No.853	MT-ND5
No.854	M6PR
No.855	DOK7
No.856	BUB1B
No.857	CAMK2G
No.858	MDH1
No.859	PDZD7
No.860	PSAT1
No.861	TRAF6
No.862	HCN1
No.863	CLRN1
No.864	FADS1
No.865	ADM
No.866	KCNN3
No.867	PAX3
No.868	FOXP2
No.869	NPPB
No.870	EZH2
No.871	RNPC3
No.872	LOC109461479
No.873	SPTAN1
No.874	MIF
No.875	CSGALNACT1
No.876	JMJD1C
No.877	HSD11B1
No.878	IGF2
No.879	FIG4
No.880	SYNGAP1
No.881	DPYD
No.882	PEPD
No.883	OBSL1
No.884	BUD23
No.885	KCNJ5
No.886	VCAM1
No.887	SIM1
No.888	RPS24
No.889	ATRIP-TREX1
No.890	GLIS3
No.891	ERVW-1
No.892	BLTP1
No.893	GRIK3
No.894	PRKCZ
No.895	CYP19A1
No.896	STAT3
No.897	NR1H3
No.898	DYNC2H1
No.899	S100A10
No.900	CEP57
No.901	CCNF
No.902	HNRNPA1
No.903	USP9X
No.904	HNF1A
No.905	MT-CO3
No.906	EEF1A2
No.907	SRCAP
No.908	DPP10
No.909	FGF23
No.910	MLH3
No.911	RREB1
No.912	APOD
No.913	DNMT3A
No.914	MIR140
No.915	PTS
No.916	ARSL
No.917	MOG
No.918	TMEM216
No.919	GCG
No.920	GGT1
No.921	METTL23
No.922	CNOT3
No.923	PITX2
No.924	CHCHD10
No.925	MSTO1
No.926	B3GALT6
No.927	SNCB
No.928	EIF4H
No.929	FKBP6
No.930	ARID1A
No.931	HARS1
No.932	SLC5A5
No.933	MIR326
No.934	ARL3
No.935	HMGCR
No.936	WHRN
No.937	PDE5A
No.938	DICER1
No.939	CASD1
No.940	DYT15
No.941	PRKCE
No.942	ADCY2
No.943	MIR146A
No.944	CYP2E1
No.945	GUSB
No.946	C4A
No.947	TBX2
No.948	VIP
No.949	ATP8B1
No.950	PIGQ
No.951	MDGA1
No.952	JAG1
No.953	MT-TN
No.954	CC2D2A
No.955	L1CAM
No.956	IL13
No.957	ETFDH
No.958	ADK
No.959	TMEM107
No.960	ANKRD11
No.961	FDFT1
No.962	NTRK3
No.963	CLCN4
No.964	CRKL
No.965	RMRP
No.966	RTL1
No.967	PPBP
No.968	PEX12
No.969	LMNB1
No.970	MYCN
No.971	SNAP29
No.972	NRAS
No.973	TRHR
No.974	MAG
No.975	FA2H
No.976	AKT3
No.977	CBS
No.978	NEFH
No.979	NAGA
No.980	LOXL3
No.981	PTH1R
No.982	SHBG
No.983	NHLRC1
No.984	FAN1
No.985	YWHAH
No.986	NDUFS4
No.987	COL9A3
No.988	LOC109504728
No.989	GHRH
No.990	CYP11B1
No.991	NALCN
No.992	CCL5
No.993	HNF1B
No.994	CUL7
No.995	GPX1
No.996	SIN3A
No.997	NEXMIF
No.998	ATP2B2
No.999	ARX
No.1000	DNAJC30
No.1001	GPC3
No.1002	BGLAP
No.1003	VAPB
No.1004	SMARCB1
No.1005	CYP21A2
No.1006	RCL1
No.1007	CDKN2B
No.1008	BAZ1B
No.1009	NPC2
No.1010	JARID2
No.1011	FGF2
No.1012	SIGMAR1
No.1013	PRDM16
No.1014	ATP6V1B2
No.1015	SUMF1
No.1016	RPS19
No.1017	SLC25A24
No.1018	HMOX1
No.1019	PDE4A
No.1020	GLE1
No.1021	ABCC8
No.1022	CRYAA
No.1023	ARID2
No.1024	UBE2A
No.1025	MPO
No.1026	GPR39
No.1027	ACTA1
No.1028	IGFBP1
No.1029	DNA2
No.1030	BRCA1
No.1031	ACVRL1
No.1032	MILR1
No.1033	EIF2B2
No.1034	UBE3B
No.1035	COL12A1
No.1036	KDM4B
No.1037	PITX1
No.1038	GP1BB
No.1039	IGFBP2
No.1040	MT-ATP6
No.1041	EGFR
No.1042	FAS
No.1043	MRAS
No.1044	RPS23
No.1045	AMACR
No.1046	SLC26A1
No.1047	HNMT
No.1048	KCNA1
No.1049	CAPN3
No.1050	ST3GAL3
No.1051	SCN8A
No.1052	WNT9B
No.1053	FOSB
No.1054	SERPINA6
No.1055	ASPH
No.1056	MAPRE2
No.1057	ATXN8
No.1058	B3GAT3
No.1059	ACAN
No.1060	NSD2
No.1061	BMP4
No.1062	FOLH1
No.1063	PTK2B
No.1064	TMEM67
No.1065	SOX11
No.1066	ADRA1A
No.1067	F3
No.1068	AMMECR1
No.1069	ARVCF
No.1070	OGG1
No.1071	CDK5
No.1072	CASK
No.1073	CACNA1G
No.1074	RFC2
No.1075	GTF2I
No.1076	GTF2IRD1
No.1077	TBL2
No.1078	CLIP2
No.1079	BCL7B
No.1080	GTF2IRD2
No.1081	METTL27
No.1082	VPS37D
No.1083	TMEM270
No.1084	ZMIZ1
No.1085	CD40LG
No.1086	GRIK5
No.1087	DUOX2
No.1088	DUOXA2
No.1089	LRP2
No.1090	DGKI
No.1091	MIR21
No.1092	APC
No.1093	PER1
No.1094	CSPP1
No.1095	IRS2
No.1096	CFAP410
No.1097	CYCS
No.1098	DYNC2I1
No.1099	KIAA0586
No.1100	ASXL1
No.1101	PIP4K2A
No.1102	GRK3
No.1103	WASF1
No.1104	HUWE1
No.1105	PIGP
No.1106	EPCAM
No.1107	MAN2C1
No.1108	CNKSR2
No.1109	SEPTIN9
No.1110	STAG3
No.1111	PFN1
No.1112	FRRS1L
No.1113	SEMA3E
No.1114	ATP1A2
No.1115	EDA2R
No.1116	DYNC1H1
No.1117	CIT
No.1118	LTA
No.1119	WASHC4
No.1120	APOA1
No.1121	AQP4
No.1122	SPOP
No.1123	GSN
No.1124	EZR
No.1125	KIAA0753
No.1126	RPGRIP1L
No.1127	MC2R
No.1128	SKI
No.1129	IFT81
No.1130	ESPN
No.1131	ALAD
No.1132	EFEMP2
No.1133	G6PD
No.1134	NIPBL
No.1135	CLIC2
No.1136	GIGYF2
No.1137	ERBB2
No.1138	IL1RAPL1
No.1139	CST3
No.1140	IGF1R
No.1141	IRAK1
No.1142	SLC38A8
No.1143	CP
No.1144	HIRA
No.1145	SMARCD1
No.1146	HSPA1A
No.1147	MED27
No.1148	IPO8
No.1149	MIR29A
No.1150	PIGG
No.1151	ITGAM
No.1152	MIR139
No.1153	HYAL1
No.1154	INTU
No.1155	MTR
No.1156	LINS1
No.1157	MT-ND6
No.1158	IL5
No.1159	ASAH1
No.1160	OPTN
No.1161	SLC6A9
No.1162	PDPN
No.1163	MIR206
No.1164	SLC12A6
No.1165	HBB
No.1166	SPAST
No.1167	ENPP1
No.1168	DGUOK
No.1169	TWIST1
No.1170	TRIM37
No.1171	MT-TS1
No.1172	MT-TL2
No.1173	BANK1
No.1174	TRIM8
No.1175	CHD8
No.1176	DAOA-AS1
No.1177	SHOX
No.1178	AFG3L2
No.1179	SRPX2
No.1180	IL18R1
No.1181	WT1
No.1182	ATXN7
No.1183	TRIO
No.1184	PAK3
No.1185	GNPTAB
No.1186	RPL11
No.1187	RPL5
No.1188	RPS10
No.1189	COLEC11
No.1190	CARS1
No.1191	MEGF8
No.1192	EIF2AK3
No.1193	PSMD9
No.1194	HTRA2
No.1195	NEMF
No.1196	CYP27B1
No.1197	BAP1
No.1198	MST1
No.1199	CTSA
No.1200	RIPK4
No.1201	TMPPE
No.1202	CCR5
No.1203	NAA10
No.1204	RAB3GAP2
No.1205	MANBA
No.1206	TET3
No.1207	ZSWIM6
No.1208	JMJD8
No.1209	KDF1
No.1210	MAPK3
No.1211	MATR3
No.1212	KCNK2
No.1213	UFD1
No.1214	P4HTM
No.1215	RECQL4
No.1216	KMT2C
No.1217	POLR1C
No.1218	USH1G
No.1219	PEX13
No.1220	SGK1
No.1221	HTR3D
No.1222	SLITRK1
No.1223	CBL
No.1224	CHRNA2
No.1225	LFNG
No.1226	IFNAR1
No.1227	HSPA4
No.1228	CR2
No.1229	CACNG5
No.1230	ULK4
No.1231	ADGRA3
No.1232	SLC39A13
No.1233	NEGR1
No.1234	CHRM1
No.1235	ACTG1
No.1236	RNF2
No.1237	FTSJ1
No.1238	KCNJ11
No.1239	FCGR3B
No.1240	PHIP
No.1241	TNFRSF1B
No.1242	BICD2
No.1243	ARTN
No.1244	KCNB1
No.1245	CHEK2
No.1246	WNT10A
No.1247	CEP78
No.1248	NLGN1
No.1249	PAX1
No.1250	EPHA4
No.1251	ADAMTS2
No.1252	CNP
No.1253	LIFR
No.1254	ATM
No.1255	ABCB11
No.1256	LOC100507346
No.1257	DEL18Q
No.1258	MS2
No.1259	MS3
No.1260	MS4
No.1261	PSS
No.1262	OCRL
No.1263	GJA5
No.1264	IL6ST
No.1265	ZC3H14
No.1266	MCHR2-AS1
No.1267	CYP17A1
No.1268	MED25
No.1269	AFG1L
No.1270	BTBD16
No.1271	PPIEL
No.1272	ERDA1
No.1273	SHOC2
No.1274	B4GALT7
No.1275	SLC18A1
No.1276	CEP290
No.1277	TBC1D24
No.1278	BICC1
No.1279	SMARCE1
No.1280	DPF2
No.1281	EFNB1
No.1282	SLC5A7
No.1283	CPOX
No.1284	MSH6
No.1285	BRD4
No.1286	MYH3
No.1287	IFT74
No.1288	GNS
No.1289	GPD2
No.1290	DPM1
No.1291	FKRP
No.1292	VIM
No.1293	SEC24C
No.1294	TRIP12
No.1295	SORT1
No.1296	SPR
No.1297	DUSP19
No.1298	RPS27A
No.1299	OPRK1
No.1300	PRKAR1B
No.1301	SCARF2
No.1302	ZFPM2
No.1303	HSPA9
No.1304	GFRA1
No.1305	TBX20
No.1306	WWOX
No.1307	ANG
No.1308	RBP4
No.1309	TNIK
No.1310	EDC3
No.1311	CIB2
No.1312	GPR101
No.1313	IAPP
No.1314	FOXL2
No.1315	GNAO1
No.1316	FLT4
No.1317	GRM4
No.1318	PON2
No.1319	ALDH6A1
No.1320	SELE
No.1321	TALDO1
No.1322	TSHR
No.1323	CHRNG
No.1324	FADS2
No.1325	GDAP2
No.1326	MED13
No.1327	CANT1
No.1328	LIG4
No.1329	TCTN2
No.1330	PACRG
No.1331	IRF4
No.1332	MT-CO2
No.1333	SLC17A5
No.1334	MT-TK
No.1335	UNC13A
No.1336	SERPINA1
No.1337	RAB23
No.1338	KCNQ1
No.1339	ADRB1
No.1340	CAMP
No.1341	CCKAR
No.1342	LTBP3
No.1343	KCNH1
No.1344	CUL4B
No.1345	DOCK3
No.1346	VANGL2
No.1347	ERCC6
No.1348	MGR6
No.1349	GAPDH
No.1350	LMX1B
No.1351	GATA4
No.1352	ABCB4
No.1353	RTN4
No.1354	EBP
No.1355	DYNC2I2
No.1356	RAD54L
No.1357	MSH4
No.1358	HEXA
No.1359	PEX5
No.1360	FKBP4
No.1361	ACOX1
No.1362	PRRT1
No.1363	MAN1B1
No.1364	KAT8
No.1365	TCTN3
No.1366	HELLS
No.1367	ANXA11
No.1368	DOCK6
No.1369	DYNC2LI1
No.1370	CD79A
No.1371	CHRND
No.1372	SLC2A2
No.1373	NPR2
No.1374	GRM8
No.1375	BCHE
No.1376	THOC2
No.1377	FHIT
No.1378	PKHD1
No.1379	KCNAB2
No.1380	UBE4B
No.1381	CASZ1
No.1382	MMP23B
No.1383	LUZP1
No.1384	HDC
No.1385	MIR198
No.1386	CDKN2C
No.1387	MAMLD1
No.1388	AADAT
No.1389	CNTNAP1
No.1390	CYP1B1
No.1391	SEMA3A
No.1392	PRKD1
No.1393	SLC3A1
No.1394	MT-TT
No.1395	PEX1
No.1396	EHHADH
No.1397	CPLX2
No.1398	BLK
No.1399	ATP1A1
No.1400	CRIPT
No.1401	CTSD
No.1402	MTHFD1
No.1403	CNOT1
No.1404	PEX16
No.1405	OPA3
No.1406	PEX7
No.1407	AGO2
No.1408	DMPK
No.1409	FMR1-AS1
No.1410	ITIH4
No.1411	NLRP3
No.1412	ALG13
No.1413	FCGR2A
No.1414	SLC19A1
No.1415	SOX3
No.1416	ADAMTSL2
No.1417	BICRA
No.1418	ACVR2A
No.1419	GCLC
No.1420	DIO1
No.1421	DIO2
No.1422	COL18A1
No.1423	B3GALNT2
No.1424	EXOC2
No.1425	NUP88
No.1426	ABCG5
No.1427	IL1RAPL2
No.1428	ICOSLG
No.1429	NTNG1
No.1430	PCSK5
No.1431	UCN
No.1432	VARS1
No.1433	FGF14
No.1434	TAF15
No.1435	MT-TQ
No.1436	USH2A-AS1
No.1437	COL6A2
No.1438	COL6A1
No.1439	MASP1
No.1440	SPP1
No.1441	LIPC
No.1442	LEPR
No.1443	DAGLA
No.1444	KDM5B
No.1445	MT-TH
No.1446	KCNH2
No.1447	ARF1
No.1448	WARS2
No.1449	APBB1
No.1450	SGO2
No.1451	AARS1
No.1452	TSNAX
No.1453	LTBP2
No.1454	SH3PXD2B
No.1455	PLA2G4A
No.1456	GNAS-AS1
No.1457	PIK3R2
No.1458	ALDH4A1
No.1459	CDCA7
No.1460	PGR
No.1461	UBE2L3
No.1462	HSPA5
No.1463	MN1
No.1464	GALR1
No.1465	HECW2
No.1466	PEX11B
No.1467	TLR7
No.1468	CDK10
No.1469	MAPK14
No.1470	TLR2
No.1471	EPO
No.1472	PAX7
No.1473	SDHA
No.1474	PARP1
No.1475	ADRA2C
No.1476	KNSTRN
No.1477	RBFOX3
No.1478	IER3IP1
No.1479	CHRNA1
No.1480	PROM1
No.1481	SMAD4
No.1482	DMXL2
No.1483	CDC73
No.1484	QKI
No.1485	CILK1
No.1486	IFT52
No.1487	MTX2
No.1488	KNG1
No.1489	NAGLU
No.1490	DMRT1
No.1491	TMEM231
No.1492	LHX3
No.1493	CHRNA3
No.1494	ABCA12
No.1495	IL7
No.1496	SZT2
No.1497	AIMP1
No.1498	CRBN
No.1499	PMS1
No.1500	KCNH5
No.1501	FBXW11
No.1502	RPS26
No.1503	ACTL6A
No.1504	TRMT1
No.1505	MESP2
No.1506	FRMPD4
No.1507	IFT80
No.1508	SP7
No.1509	ZBTB20
No.1510	ETFA
No.1511	OFD1
No.1512	PEX26
No.1513	PSMB8
No.1514	ABL1
No.1515	C4B
No.1516	CHD2
No.1517	MED12L
No.1518	NANS
No.1519	GNB2
No.1520	WDFY3
No.1521	TANC2
No.1522	BCORL1
No.1523	HPDL
No.1524	PLK2
No.1525	DGKG
No.1526	NPPA
No.1527	CEP85L
No.1528	SLC30A8
No.1529	LCN2
No.1530	SLC9A7
No.1531	ADA2
No.1532	IRF5
No.1533	ATP2B3
No.1534	CXCL12
No.1535	SNX14
No.1536	AIFM1
No.1537	RLIM
No.1538	MBP
No.1539	PPT1
No.1540	ERCC2
No.1541	DHCR24
No.1542	RPL26
No.1543	RPL35A
No.1544	RPS17
No.1545	CHGA
No.1546	NCDN
No.1547	SCZD1
No.1548	SCZD10
No.1549	SCZD6
No.1550	SCZD8
No.1551	EED
No.1552	RALGAPA1
No.1553	ZNF41
No.1554	TRPS1
No.1555	KIF5C
No.1556	MKS1
No.1557	HS2ST1
No.1558	NMNAT1
No.1559	AP4E1
No.1560	CPN1
No.1561	PAX8
No.1562	DNAJC5
No.1563	COASY
No.1564	DIS3L2
No.1565	NUCB2
No.1566	PRICKLE1
No.1567	HLA-C
No.1568	PLCB4
No.1569	SATB1
No.1570	DLL3
No.1571	TRAPPC4
No.1572	HES7
No.1573	TNRC6B
No.1574	COG2
No.1575	MIR17
No.1576	CCND1
No.1577	VCAN
No.1578	GM2A
No.1579	VAMP2
No.1580	MRE11
No.1581	NTS
No.1582	GCK
No.1583	MAGEL2
No.1584	MYC
No.1585	COL9A1
No.1586	NAA20
No.1587	TTC26
No.1588	CCL3
No.1589	EPG5
No.1590	APOA4
No.1591	CD36
No.1592	MIR143
No.1593	LY86
No.1594	PLAT
No.1595	TFRC
No.1596	XPR1
No.1597	KIF11
No.1598	ARRB2
No.1599	MUS81
No.1600	NVL
No.1601	FOXP3
No.1602	ENO2
No.1603	PPARA
No.1604	SDHD
No.1605	ITPR3
No.1606	SMG8
No.1607	KCTD1
No.1608	POLE
No.1609	TSPAN7
No.1610	IYD
No.1611	LRP1
No.1612	SELL
No.1613	ACO2
No.1614	NLGN4X
No.1615	AP2M1
No.1616	SDHB
No.1617	SLC25A22
No.1618	FRAS1
No.1619	FREM2
No.1620	TSR2
No.1621	STK32C
No.1622	CDKN3
No.1623	AGA
No.1624	BRDT
No.1625	APOL2
No.1626	APOL4
No.1627	INSL6
No.1628	IRAK1BP1
No.1629	LOC100130987
No.1630	GTS
No.1631	LOC107982234
No.1632	LOC109029533
No.1633	PAND1
No.1634	SCZD2
No.1635	SCZD3
No.1636	SCZD7
No.1637	DEL11P13
No.1638	DUP1Q21
No.1639	MGR1
No.1640	MGR12
No.1641	MGR2
No.1642	MGR3
No.1643	MGR5
No.1644	MGR8
No.1645	SCZD11
No.1646	SCZD12
No.1647	SCZD13
No.1648	SCZD14
No.1649	MGR10
No.1650	MGR11
No.1651	MCTP2
No.1652	CX3CL1
No.1653	ESCO2
No.1654	THBS1
No.1655	MAP3K7
No.1656	ANKRD17
No.1657	APAF1
No.1658	PDSS1
No.1659	MOBP
No.1660	DCPS
No.1661	PPM1B
No.1662	TTC5
No.1663	ALKBH8
No.1664	SHROOM4
No.1665	MT-TW
No.1666	LIPN
No.1667	GLO1
No.1668	CHRNA5
No.1669	DBP
No.1670	PUS7
No.1671	SMOC1
No.1672	ANTXR1
No.1673	IARS2
No.1674	PEX10
No.1675	LARP7
No.1676	FCGR2B
No.1677	FAM50A
No.1678	JUN
No.1679	RPGRIP1
No.1680	B9D1
No.1681	ADAT3
No.1682	TRPM3
No.1683	EIF4E
No.1684	ADGRG6
No.1685	ABCA7
No.1686	ADAR
No.1687	IKZF1
No.1688	SRD5A3
No.1689	AKR1A1
No.1690	CSF3
No.1691	PNLIP
No.1692	TBX5
No.1693	PLA2G2A
No.1694	GDI1
No.1695	UGP2
No.1696	FAR1
No.1697	FTH1
No.1698	TTF2
No.1699	PHGDH
No.1700	FBXO7
No.1701	ITGAL
No.1702	ABCA1
No.1703	DEFB1
No.1704	ABCA13
No.1705	TFE3
No.1706	SKIC3
No.1707	LMBRD2
No.1708	CCDC32
No.1709	QARS1
No.1710	CAMK2B
No.1711	CDK13
No.1712	PIGV
No.1713	IFT88
No.1714	CYP3A5
No.1715	AGL
No.1716	ANK1
No.1717	GMIP
No.1718	SEMA4D
No.1719	GPR35
No.1720	NDST1
No.1721	P4HA2
No.1722	SEMA4A
No.1723	PON3
No.1724	TECR
No.1725	CRADD
No.1726	PRPH
No.1727	SARS1
No.1728	TUSC3
No.1729	MED23
No.1730	PRSS12
No.1731	MBOAT7
No.1732	TBC1D7
No.1733	UBE4A
No.1734	PIGC
No.1735	FMN2
No.1736	UFSP2
No.1737	CABP4
No.1738	JRK
No.1739	C12orf4
No.1740	MT-TF
No.1741	CLCN3
No.1742	HSPA1B
No.1743	NFE2L2
No.1744	FNDC5
No.1745	CD80
No.1746	PRICKLE2
No.1747	USH2A-AS2
No.1748	FKBP14
No.1749	TMEM161B
No.1750	HFE
No.1751	PLCB3
No.1752	COG8
No.1753	REV3L
No.1754	FEV
No.1755	PEX2
No.1756	FLII
No.1757	PIGU
No.1758	GABRA6
No.1759	HMGA1
No.1760	DYNLT2B
No.1761	KDM1A
No.1762	NEUROD2
No.1763	IFNA2
No.1764	XDH
No.1765	MYH6
No.1766	HRH1
No.1767	ADCY8
No.1768	PTCH2
No.1769	SAT1
No.1770	SLC20A2
No.1771	IMPDH2
No.1772	KYNU
No.1773	ANKH
No.1774	CLCNKB
No.1775	SCGB1A1
No.1776	ACP1
No.1777	QDPR
No.1778	CXCR4
No.1779	SLC12A3
No.1780	VEGFC
No.1781	MIR125A
No.1782	REST
No.1783	CXCL10
No.1784	CD40
No.1785	PEX19
No.1786	FREM1
No.1787	PSMD12
No.1788	BPTF
No.1789	SON
No.1790	MAPK8IP3
No.1791	TBCE
No.1792	SMPD4
No.1793	ENO1
No.1794	ITGA8
No.1795	TXNDC15
No.1796	CORT
No.1797	FLNC
No.1798	MSX1
No.1799	RPL36A-HNRNPH2
No.1800	CTSF
No.1801	HSPA1L
No.1802	MIR98
No.1803	ZNF292
No.1804	LMNA
No.1805	FANCM
No.1806	KDM3A
No.1807	LIPG
No.1808	SLC2A4
No.1809	CASP9
No.1810	MMP2
No.1811	C1QTNF3-AMACR
No.1812	RANBP2
No.1813	CDH2
No.1814	NR5A1
No.1815	DCC
No.1816	BBS1
No.1817	BBS7
No.1818	PAM16
No.1819	GNAT2
No.1820	DDR2
No.1821	PNKP
No.1822	DDX6
No.1823	PTPN23
No.1824	UPF3B
No.1825	SYNCRIP
No.1826	BCAS3
No.1827	EMC10
No.1828	TMEM237
No.1829	UBR7
No.1830	RIPPLY2
No.1831	SVBP
No.1832	MYMK
No.1833	LAPTM4A
No.1834	GATA6
No.1835	LONP1
No.1836	GNPAT
No.1837	ADAMTS10
No.1838	SIX2
No.1839	UQCC2
No.1840	SERPINA7
No.1841	ENG
No.1842	ACE2
No.1843	TLR3
No.1844	TNIP1
No.1845	KL
No.1846	DMRT3
No.1847	PRKACB
No.1848	SLC12A5
No.1849	RASA1
No.1850	ARRB1
No.1851	PDE1A
No.1852	NTRK1
No.1853	EFEMP1
No.1854	LHFPL5
No.1855	PDE9A
No.1856	ZDHHC24
No.1857	SORL1
No.1858	MYO3A
No.1859	MIR182
No.1860	F5
No.1861	CALB2
No.1862	PRKCD
No.1863	CD86
No.1864	AMH
No.1865	ANXA2
No.1866	AXIN2
No.1867	KMO
No.1868	COL6A3
No.1869	ORC4
No.1870	SMARCC2
No.1871	YARS1
No.1872	MID2
No.1873	ZNF81
No.1874	CHL1
No.1875	PECAM1
No.1876	CLU
No.1877	PTPRD
No.1878	HTR5A
No.1879	EIF2S3
No.1880	SIK1
No.1881	RPL18
No.1882	RPL35
No.1883	SMARCAL1
No.1884	RPL15
No.1885	RPL27
No.1886	RPS15A
No.1887	RPS27
No.1888	RPL31
No.1889	RPS29
No.1890	RPS7
No.1891	RPS28
No.1892	NEPRO
No.1893	SMG9
No.1894	ABCG8
No.1895	ASCC1
No.1896	GNAI3
No.1897	CITED2
No.1898	BCS1L
No.1899	NISCH
No.1900	SCD
No.1901	IL16
No.1902	CDH17
No.1903	PRKCA
No.1904	DNAH8
No.1905	CSF2
No.1906	BUB1
No.1907	BUB3
No.1908	TRIP13
No.1909	MAP1B
No.1910	IGF2BP2
No.1911	RIF1
No.1912	TSPOAP1
No.1913	FASN
No.1914	PEX14
No.1915	RPL10
No.1916	RNF135
No.1917	TYR
No.1918	GATAD2B
No.1919	KLC2
No.1920	SLC17A6
No.1921	KREMEN1
No.1922	GTPBP2
No.1923	NSMCE3
No.1924	HMGB1
No.1925	NOTCH1
No.1926	SCN5A
No.1927	WDPCP
No.1928	LCAT
No.1929	SLC16A2
No.1930	WDR4
No.1931	GC
No.1932	KCNK9
No.1933	FGF12
No.1934	IGF2R
No.1935	LTBP1
No.1936	LOC102724058
No.1937	ATN1
No.1938	MAP1LC3B
No.1939	SYN3
No.1940	PAEP
No.1941	PNMT
No.1942	TNNC1
No.1943	WWC1
No.1944	CCL4
No.1945	CPA6
No.1946	SPAG1
No.1947	ARFGEF1-DT
No.1948	EIF3F
No.1949	GJA8
No.1950	CCDC8
No.1951	RAPGEF3
No.1952	PCDHB14
No.1953	CALR
No.1954	LMBR1
No.1955	CYLD
No.1956	LINC00578
No.1957	NEU1
No.1958	MIR221
No.1959	IRF8
No.1960	GALNT17
No.1961	SIAH1
No.1962	SCT
No.1963	EIF2B5
No.1964	HDAC9
No.1965	APOH
No.1966	SKIC2
No.1967	LRRC7
No.1968	BACE1
No.1969	H3-3B
No.1970	ATP6V0A2
No.1971	SPATA5
No.1972	AASS
No.1973	AIF1
No.1974	OPA1
No.1975	SULT2A1
No.1976	SHISA6
No.1977	FTL
No.1978	LIF
No.1979	SLC26A5-AS1
No.1980	PTPN1
No.1981	ADAMTS19
No.1982	ZDHHC8
No.1983	NEUROD1
No.1984	PIK3CG
No.1985	CYP2A6
No.1986	MGP
No.1987	PEX3
No.1988	RAB3GAP1
No.1989	TERT
No.1990	DEL22Q11.2
No.1991	DSE
No.1992	B9D2
No.1993	TCTN1
No.1994	GREB1L
No.1995	GPX4
No.1996	MDGA2
No.1997	OFCC1
No.1998	WAS
[truncated: 1,661 more rows]
