# Supplementary material for: Dihydromyricetin Attenuates Depressive-like Behaviors in Mice by Inhibiting the AGE-RAGE Signaling Pathway
Source: Cells. 2022 Nov 22;11(23):3730. doi: 10.3390/cells11233730 (PMC9738449; doi:10.3390/cells11233730)
Supplement: Supplementary file 1 [file cells-11-03730-s001.zip › Table S3 DHM.xlsx]

## Sheet: Sheet1
Table S3 intersecting targets
	gene name	Degree
No.1	SRC	38
No.2	HSP90AA1	37
No.3	ESR1	36
No.4	VEGFA	35
No.5	HIF1A	35
No.6	SIRT1	31
No.7	PTGS2	31
No.8	PPARG	28
No.9	MMP9	27
No.10	APP	23
No.11	MDM2	22
No.12	MAPK14	22
No.13	AR	22
No.14	PGR	22
No.15	GRIN2B	21
No.16	MET	20
No.17	MMP2	19
No.18	STAT1	19
No.19	PPARA	18
No.20	GRM5	18
No.21	ESR2	17
No.22	AHR	17
No.23	SERPINE1	16
No.24	PTPRC	16
No.25	CASP9	16
No.26	KIT	16
No.27	FGFR1	15
No.28	MAPT	15
No.29	HNF4A	15
No.30	TERT	14
No.31	CNR1	14
No.32	DRD2	14
No.33	CYP19A1	13
No.34	CYP1A2	13
No.35	ABCB1	13
No.36	DNMT1	12
No.37	GRIA2	12
No.38	PTPN1	11
No.39	CHRNA4	11
No.40	HDAC4	11
No.41	GABRG2	10
No.42	CACNA1B	10
No.43	BCL2A1	10
No.44	SIRT2	10
No.45	MAOB	10
No.46	GRM2	10
No.47	CYP1B1	10
No.48	GABRA1	9
No.49	GABRB2	9
No.50	PGF	8
No.51	MAOA	8
No.52	DRD5	8
No.53	BACE1	8
No.54	PRKCE	8
No.55	RPS6KA3	7
No.56	SHBG	7
No.57	PLAT	7
No.58	MIF	6
No.59	RXRA	6
No.60	BCL2	6
No.61	DYRK1A	6
No.62	NR3C2	5
No.63	ADORA1	5
No.64	PTGS1	4
No.65	PLA2G2A	4
No.66	KCNH2	4
No.67	GPR35	3
No.68	XDH	2
No.69	HTR1E	2
No.70	CA4	2
No.71	RORA	1
No.72	ADRA2B	1
No.73	ABCC1	1
